# Supplementary material
Source: publisher figshare collection journal article supplement (https://acs.figshare.com/ndownloader/files/4736689)

## Supplementary Information

# **Design of Molecular Scaffolds Based on Unusual Geometries for Magnetic Modulation of Spin-diverse Complexes with Selective Redox Response**

Maurício Lanznaster,<sup>†,||</sup> Mary Jane Heeg,<sup>†</sup> Gordon T. Yee,<sup>‡</sup>  
Bruce R. McGarvey,<sup>§,\*</sup> Claudio N. Verani<sup>†,\*</sup>

<sup>†</sup> Department of Chemistry, Wayne State University - 5101 Cass Ave. Detroit, MI 48202

<sup>‡</sup> Department of Chemistry Virginia Polytechnic Institute and State University - 107  
Davidson Hall Blacksburg, VA 24061

<sup>§</sup> Department of Chemistry and Biochemistry, University of Windsor - 401 Sunset Ave.  
Windsor, ON N9B 1P4, Canada

**Figure S1.** Two different views for the overlap of the least-squares fits for **2** and **3** Dihedral angles between the outer rings of the phenanthroline ligands are  $9.5(2)^\circ$  for **2** and  $1.5(5)^\circ$  for **3**.

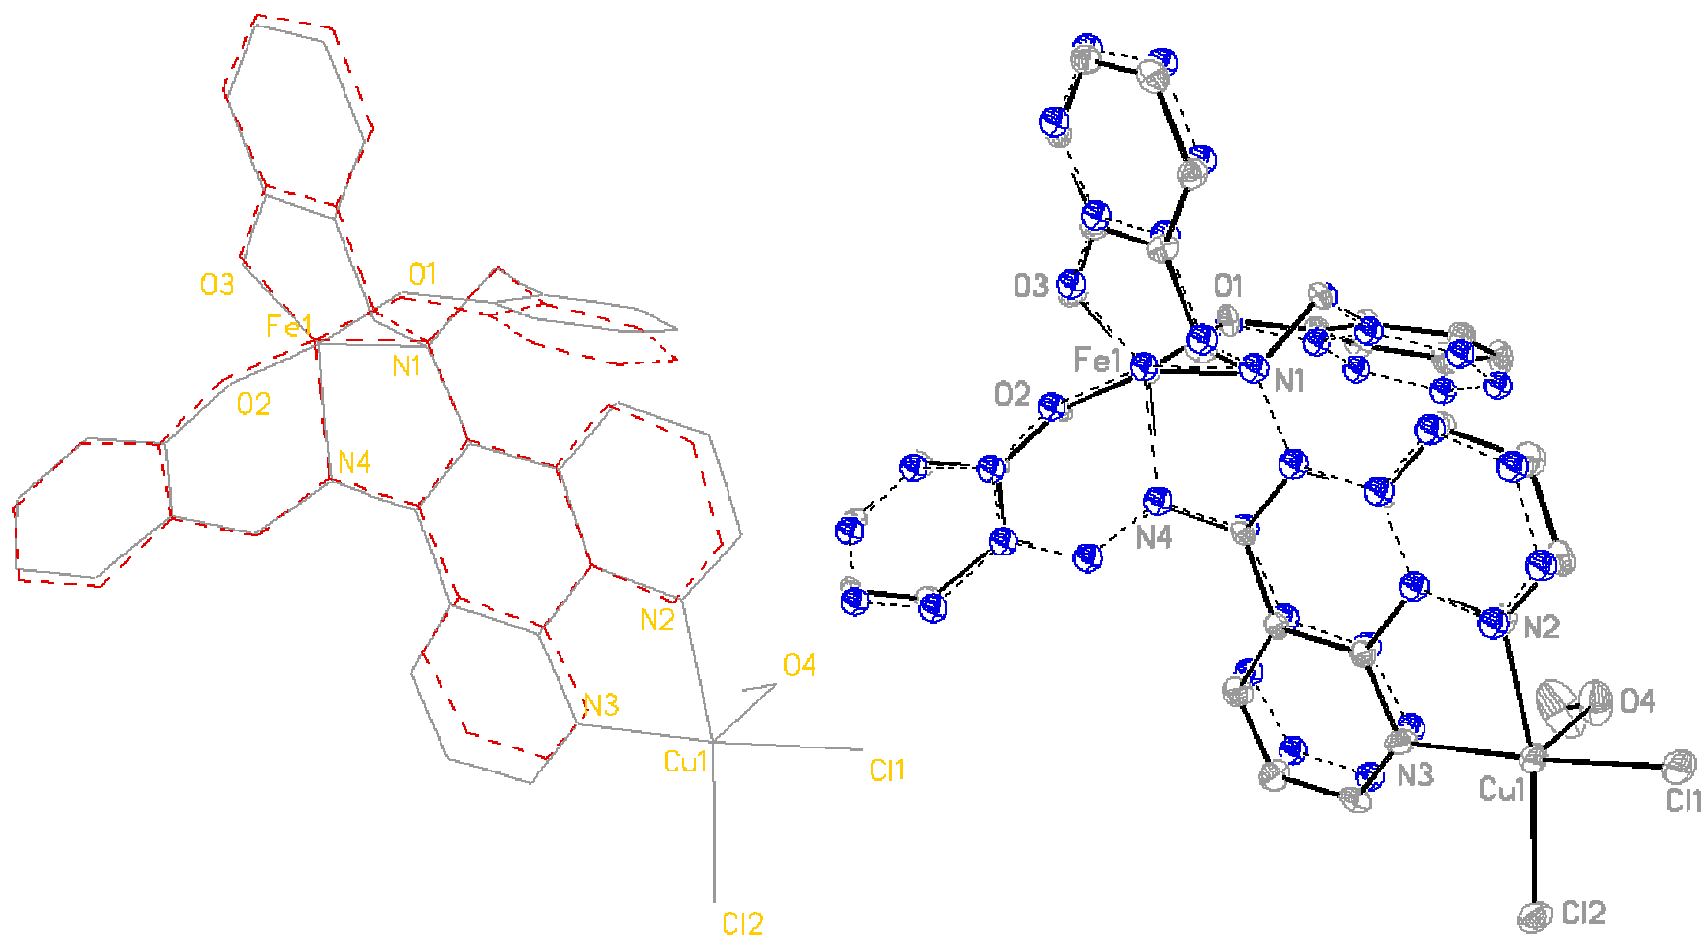

## Analysis of the EPR Spectrum for High Spin Fe(III) centers.

The EPR spectra of high spin Fe(III),  $S = 5/2$ , powder samples can be very complex, but become simpler when the zero field interactions have magnitudes greater than the photon energy of the EPR spectrometer. This behavior is demonstrated in **Figures 2S, 3S and 4S**, where simulations are presented for various relevant situations for an X-band EPR spectrometer. These spectra were calculated assuming using the spin Hamiltonian given in the paper with  $g = 2.0$  and various values of  $D$  and  $E$  and a spectrometer frequency of 9.75 GHz. The fourth order spin terms were taken to be zero. The  $D$ ,  $E$  values are listed in gauss and the relevant value for the photon energy in gauss is 3500, so values of  $D$  greater than 3500 gauss have zero field interactions greater than the Zeemann energy of the system.

In **Figure 2S**, we have plotted spectra for the maximum magnitude of  $E$ , which is one-third of  $D$ . Note that for  $D$  values below 3500 gauss, the spectra show many features from  $B = 0$  to 10000 gauss but for higher  $D$  values only the peak at  $g = 4.3$  is present. At higher gain a second turning point is noted at  $g = 8$ . This single peak at  $g = 4.3$  has been observed frequently for biological samples containing high spin Fe(III).

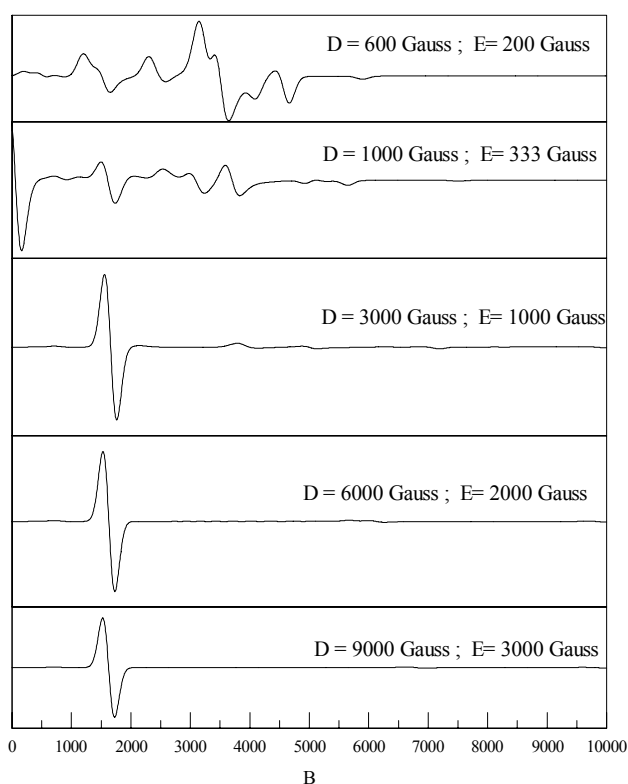

**Figure S2.** Fe(III) EPR spectra simulated for  $E = D/3$  case. The peak at 1600 gauss ( $g \sim 4.3$ ) persists as  $D$  increases. Notice the major changes when  $D$  is less than 3000. Simulation assumes X-band frequency of 9.75 GHz (3500 gauss).

In **Figure 3S**, we have plotted spectra for different D values but the symmetry has been taken as axial where  $E = 0$ . In this case the spectrum is dominated by one peak when D is much greater than 3500 gauss but it has a g value of 6 instead of 4.3. This spectrum is commonly observed in Fe(III) porphyrins.

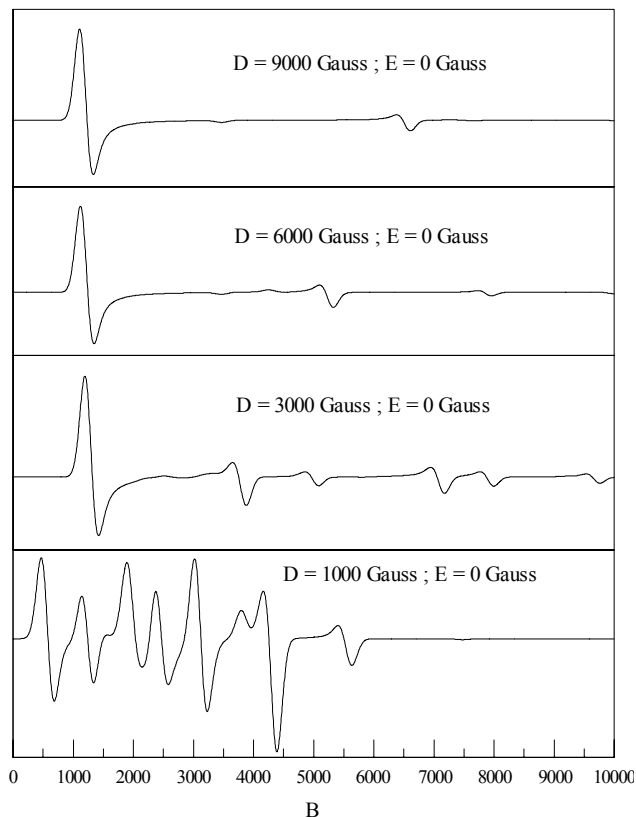

**Figure S3.** Figure shows how EPR spectrum of Fe(III) changes with D when  $E = 0$ . Note that the peak at 1200 gauss ( $g \sim 6$ ) remains fixed above  $D = 3000$  gauss. This continues to remain there for much larger D values. It is the only peak detected in Fe(III) porphyrins.

In **Figure 4S**, we observe the effect of varying  $E$  for a value of  $D = 6000$  gauss, larger than 3500 gauss. It will be noted that as  $E$  is reduced from its maximum value of  $D/3$  the  $g = 4.3$  line becomes asymmetric and splits into multiple lines. Also the intensity of the  $g = 8$  turning point strengthens relative to the main peak at  $g = 4.3$ . This mainly is what we observe in our Fe(III) spectrum and thus leads us to propose that  $D$  is much greater than  $0.3 \text{ cm}^{-1}$  and that the magnitude of  $E$  is slightly less than  $D/3$ .

In this system the only way to get good values for the zero field parameters is to study the EPR spectra over a larger range of magnetic fields with spectrometer frequencies much larger than that of an X-band spectrometer.

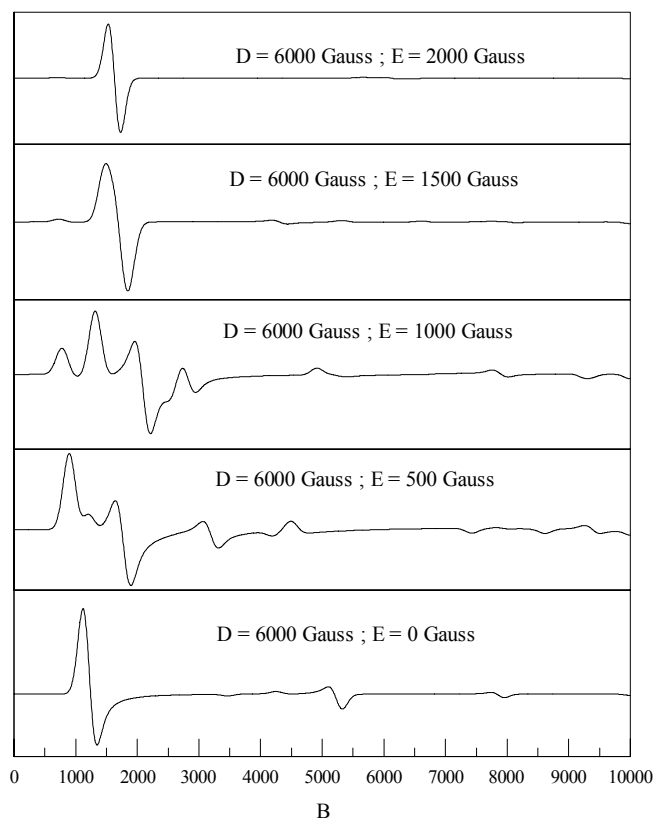

**Figure S4.** Figure shows simulated Fe(III) spectra for different values of  $E$  with  $D = 6000$  gauss to maximum  $E$  value of  $D/3 = 2000$  gauss. Note that semi peak at 800 gauss becomes more prominent at  $E = 1500$  gauss.

**Figures S5 and S6: Infrared Spectrum for 3.**  
**From 4000 to 400  $\text{cm}^{-1}$**

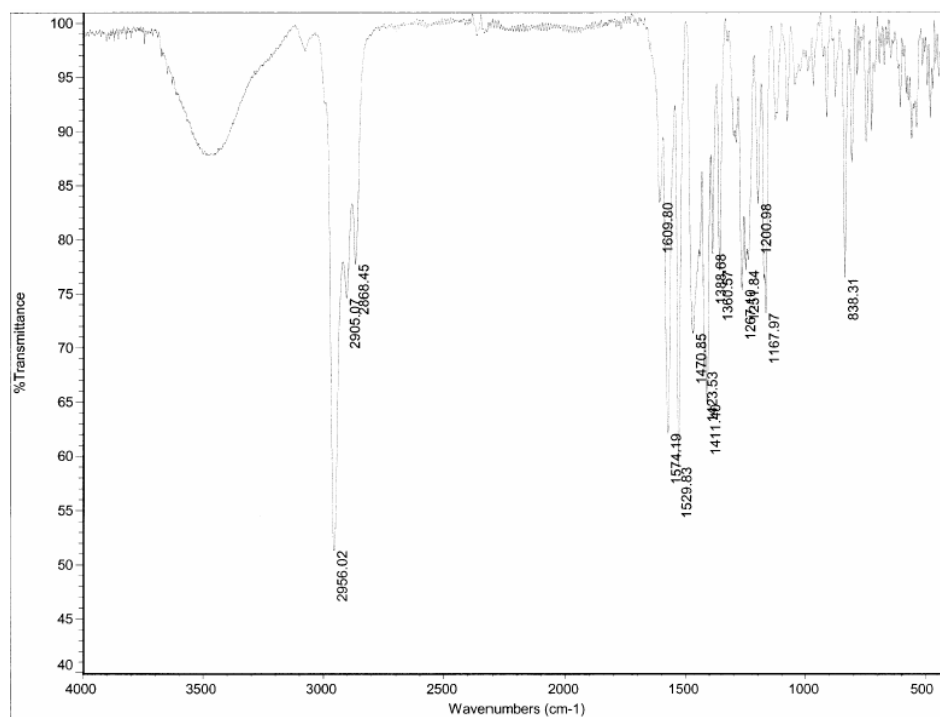

**From 1800 to 400  $\text{cm}^{-1}$**

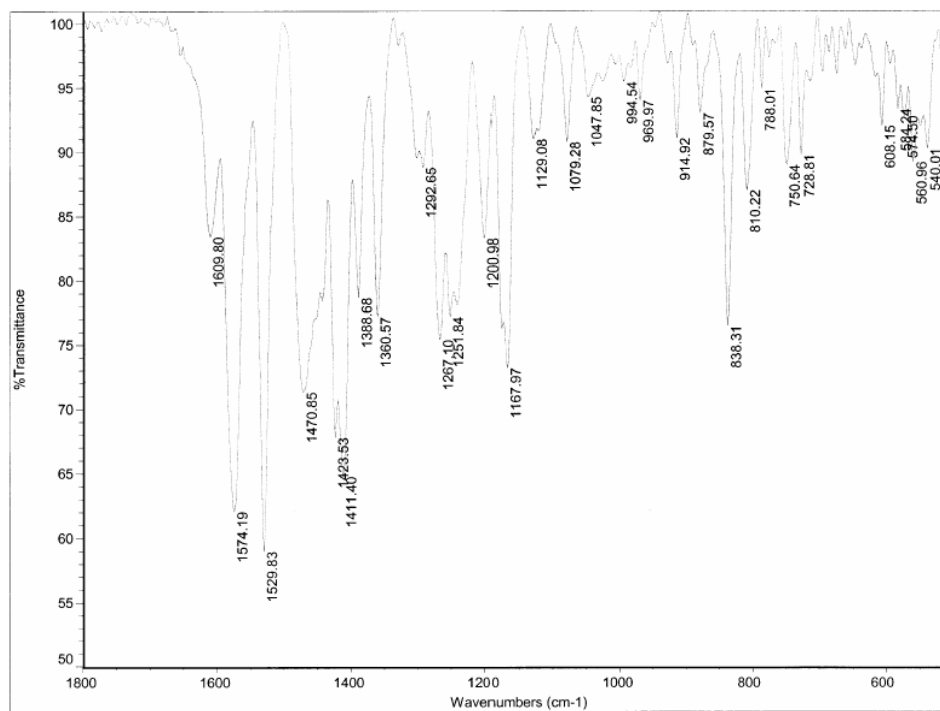

Supplement: Supplementary file 1 [file 4736689]
